# Supplementary material
Source: PubMed Central journal article supplement (PMC2336884)
Supplement: JCI0834944sd.pdf [file JCI0834944sd.pdf]

“Stat3 and Stat1 mediate IL-11-dependent and inflammation-associated gastric cancer in gp130 receptor mutant mice”,

Ernst *et al*,

IFN-mediated anti-viral activity in MEFs in response to infection with Semliki Forest Virus

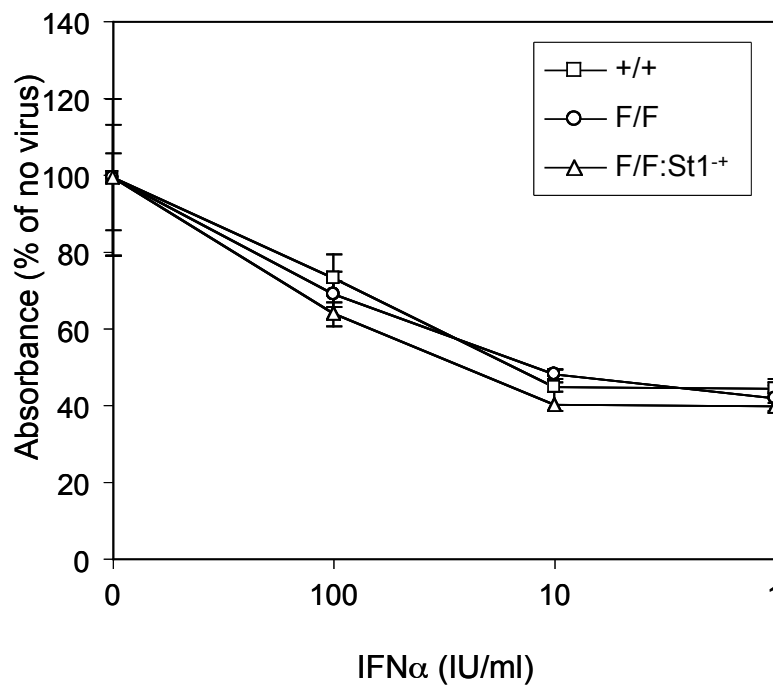

**Supplemental Figure 1.** Intact interferon (IFN) response in  $gp130^{Y757F/Y757F};Stat1^{+/-}$  mouse embryonic fibroblasts (MEFs).

IFN-mediated anti-viral activity was assessed upon infection of MEFs belonging to the indicated genotypes with Semliki Forest Virus (64). Cells were stimulated with varying concentrations of IFN $\alpha$ , and simultaneously challenged with virus as indicated. The extent of IFN-mediated cell survival was assessed by MTT (dimethyl thiazole diphenyl tetrazolium bromide) assay.
